# Supplementary material
Source: publisher figshare collection journal article supplement (https://gsajournals.figshare.com/ndownloader/files/21930690)
Supplement: Supplementary file 1 [file 21930690]

| WBGene | Sequence | Gene name | RNAi clone |
| --- | --- | --- | --- |
| WBGene00009050 | F22D6.2 | F22D6.2 | Yes |
| WBGene00003017 | K10G6.1 | *lin-31* | Yes |
| WBGene00003618 | E02H1.7 | *nhr-19* | Yes |
| WBGene00001971 | Y48B6A.14 | *hmg-1.1* | Yes |
| WBGene00018990 | F56F11.3 | *klf-1* | Yes |
| WBGene00006543 | F21H11.3 | *tbx-2* | Yes |
| WBGene00004858 | R12B2.1 | *sma-4* | Yes |
| WBGene00000437 | R13A5.5 | *ceh-13* | Yes |
| WBGene00013560 | Y75B8A.29 | *zip-12* | Yes |
| WBGene00003636 | C45E5.6 | *nhr-46* | Yes |
| WBGene00003625 | C26B2.3 | *nhr-31* | Yes |
| WBGene00003687 | H27C11.1 | *nhr-97* | Yes |
| WBGene00003633 | C29E6.5 | *nhr-43* | Yes |
| WBGene00009532 | F38B7.1 | *ccch-1* | Yes |
| WBGene00000238 | C54D1.6 | *bar-1* | Yes |
| WBGene00003613 | T01B10.4 | *nhr-14* | Yes |
| WBGene00003511 | F46G10.6 | *mxl-3* | Yes |
| WBGene00001251 | K02B9.4 | *elt-3* | Yes |
| WBGene00000221 | T04C10.4 | *atf-5* | No |
| WBGene00007907 | C34B4.2 | C34B4.2 | No |
| WBGene00003480 | F54H5.4 | *klf-3* | No |
| WBGene00010137 | F55H12.6 | *ztf-26* | No |
| WBGene00019521 | K08B12.2 | *dmd-7* | No |
| WBGene00019960 | R08E3.4 | *ztf-16* | No |
| WBGene00001324 | R11E3.6 | *eor-1* | No |
| WBGene00003228 | W03C9.7 | *mex-1* | No |
| WBGene00012330 | W07G1.3 | *zip-3* | No |
| WBGene00003704 | Y45G5AM.1 | *nhr-114* | No |
| WBGene00003604 | Y73F8A.21 | *nhr-5* | No |

Supplemental Table 2. Hypodermally enriched transcription factors
